# Supplementary material for: Mean Velocity of the Pulmonary Artery as a Clinically Relevant Prognostic Indicator in Patients with Heart Failure with Preserved Ejection Fraction
Source: MDPI journal article supplement (doi:10.3390/jcm11030491), 2022-01-19
Supplement: s1 [file s1]

**Supplementary Table S1.** Baseline clinical and imaging characteristics according to the performance of right heart catheterization.

|                                                            | No RHC<br>(n=30) | RHC<br>(n=28) | Total sample<br>(n=58) | p-<br>value |
|------------------------------------------------------------|------------------|---------------|------------------------|-------------|
| Age (years)                                                | 68.7±13.9        | 66±13.2       | 67.5±13.5              | 0.454       |
| Sex, male (n,%)                                            | 21(70)           | 13(46.4)      | 34(58.6)               | 0.069       |
| BSA (m <sup>2</sup> )                                      | 1.8±0.13         | 1.7±0.18      | 1.8±0.17               | 0.010       |
| Arterial hypertension (n,%)                                | 13(43.3)         | 17(60.7)      | 30(51.7)               | 0.186       |
| Diabetes mellitus (n,%)                                    | 5(16.7)          | 5(17.9)       | 10(17.2)               | 0.905       |
| Dislipidemia (n,%)                                         | 13(43.3)         | 11(39.3)      | 24(41.4)               | 0.754       |
| Atrial fibrillation (n,%)                                  | 12(40)           | 15(53.6)      | 27(46.6)               | 0.300       |
| LBBB                                                       | 4(13.3)          | 1(3.6)        | 5(8.6)                 | 0.186       |
| Previous coronary artery disease (n,%)                     | 6(20)            | 2(7.1)        | 8(13.8)                | 0.156       |
| Glomerular filtration rate<br>(ml/min/1.73m <sup>2</sup> ) | 78.3±15.3        | 69.4±19.7     | 72.9±17.8              | 0.151       |
| Stage 3-4 chronic kidney disease (n,%)                     | 3(10)            | 3(10.7)       | 6(10.3)                | 0.962       |
| NT-proBNP (pg/mL)                                          | 1032.2±991.5     | 1349.9±1241.9 | 1281.8±1164.5          | 0.692       |
| Prior HF hospitalization (n,%)                             | 4(13.3)          | 8(28.6)       | 12(20.7)               | 0.152       |
| NYHA functional class (n,%)                                |                  |               |                        | <0.001      |
| I                                                          | 16(53.3)         | 3(10.7)       | 19(32.8)               |             |
| II                                                         | 13(43.3)         | 11(39.3)      | 24(41.4)               |             |
| III                                                        | 0                | 10(35.7)      | 10(17.2)               |             |
| IV                                                         | 1(3.3)           | 4(14.3)       | 5(8.6)                 |             |
| NYHA III-IV/IV (n,%)                                       | 1(3.3)           | 14(50)        | 15(25.9)               | <0.001      |
| Cerebrovascular disease (n,%)                              | 3(10)            | 5(17.9)       | 8(13.8)                | 0.386       |
| <b>Echocardiography-parameters</b>                         |                  |               |                        |             |
| LVEF (%)                                                   | 56.5±8.7         | 60.2±9.3      | 58.3±9.1               | 0.134       |
| LV septum width (mm)                                       | 12.7±1.8         | 12.2±1.6      | 12.4±1.7               | 0.367       |
| LV posterior wall width (mm)                               | 10.9±1.9         | 11.9±1.9      | 11.1±1.9               | 0.553       |
| LVEDD (mm)                                                 | 47.5±6.6         | 47.1±6.8      | 47.2±6.6               | 0.818       |
| LVESD (mm)                                                 | 34.7±7.4         | 30±12.9       | 32.5±10.5              | 0.201       |
| Indexed left atrial volume (ml/m <sup>2</sup> )            | 43.9±19.8        | 50.8±16.5     | 47.1±18.5              | 0.204       |
| E/A ratio                                                  | 0.9±0.7          | 1.3±0.6       | 1.2±0.7                | 0.167       |
| DT (ms)                                                    | 218.6±49.9       | 195.5±44.6    | 208.4±48.1             | 0.241       |
| e' (septal)                                                | 6.2±1.8          | 6.8±1.6       | 6.5±1.9                | 0.326       |
| e' (lateral)                                               | 11.1±4.5         | 9.5±2.5       | 10.2±3.5               | 0.218       |
| E/e' ratio (lateral)                                       | 7.2±3.6          | 8.0±2.7       | 7.5±3.3                | 0.493       |
| TAPSE (mm)                                                 | 22.1±4.9         | 19.6±3.9      | 20.9±4.6               | 0.052       |
| S' tricuspid (cm/s)                                        | 12.3±2.9         | 9.5±2.6       | 10.9±3                 | 0.009       |
| Pulmonary acceleration time (ms)                           | 96.3±21.6        | 76.7±22.8     | 85.9±24                | 0.015       |
| PAPs (mmHg)                                                | 39.6±12.1        | 51.2±17.6     | 45.6±16.1              | 0.010       |
| TAPSE/PAPs                                                 | 0.59±0.2         | 0.42±0.2      | 0.5±0.2                | 0.008       |
| TR grade ≥ 3/4                                             | 3(10)            | 8(28.6)       | 11(19)                 | 0.071       |
| <b>CMR-parameters</b>                                      |                  |               |                        |             |
| LVEF (%)                                                   | 58.6±8.4         | 60.5±8.9      | 59.5±8.7               | 0.400       |
| iLVEDV (ml/m <sup>2</sup> )                                | 86±28.6          | 75.8±25.5     | 81.1±27.4              | 0.158       |
| iLVESV (ml/m <sup>2</sup> )                                | 38.2±19.9        | 32±20.3       | 35.2±20.1              | 0.247       |
| Left ventricular mass (gr)                                 | 77.5±24.4        | 66.5±19.4     | 72±22.5                | 0.068       |
| RVEF (%)                                                   | 56.3±9.5         | 52.5±12       | 54.4±10.9              | 0.197       |
| iRVEDV (ml/m <sup>2</sup> )                                | 95.3±33.7        | 101.8±28.5    | 98.5±31.1              | 0.437       |
| iRVESV (ml/m <sup>2</sup> )                                | 43.3±23.9        | 47.9±16.8     | 45.6±20.7              | 0.408       |
| LGE (n,%)                                                  | 8(26.7)          | 15(53.6)      | 23(39.7)               | 0.041       |

|                                                   |           |           |           |       |
|---------------------------------------------------|-----------|-----------|-----------|-------|
| LGE ischemic pattern (n,%)                        | 5(16.7)   | 15(53.6)  | 5(8.6)    | 0.004 |
| LGE non-ischemic pattern (n,%)                    | 4(13.3)   | 1(3.6)    | 20(34.5)  | 0.173 |
| Left atrial area (mm <sup>2</sup> )               | 15.7±4.9  | 18.2±4.3  | 16.9±4.7  | 0.061 |
| Right atrial area (mm <sup>2</sup> )              | 15.1±5.6  | 18.7±8.9  | 16.8±7.5  | 0.095 |
| Maximal PA area (cm <sup>2</sup> )                | 9.1±3.4   | 9.9±3     | 9.5±3.2   | 0.354 |
| Minimal PA area (cm <sup>2</sup> )                | 7.1±2.7   | 8.1±2.5   | 7.6±2.6   | 0.168 |
| PA pulsatility (%)                                | 29.3±16.5 | 23.7±15.4 | 26.7±16.1 | 0.194 |
| Right ventricular Ea/E <sub>max</sub>             | 0.83±0.37 | 1.02±0.62 | 0.93±0.51 | 0.152 |
| mvPA (cm/s)                                       | 10.9±3.9  | 8.6±3.6   | 9.8±3.9   | 0.022 |
| PVR-CMR (Wood Units)                              | 4±1.8     | 5.6±2.5   | 4.8±2.3   | 0.008 |
| <b>Cardiovascular events</b>                      |           |           |           |       |
| Readmission for decompensated heart failure (n,%) | 5(16.7)   | 10(35.7)  | 15(25.9)  | 0.098 |
| All-cause death (n,%)                             | 6(20)     | 2(7.1)    | 8(13.8)   | 0.156 |
| Primary combined endpoint (n,%)                   | 9(30)     | 12(42.9)  | 21(36.2)  | 0.309 |

BSA: body surface area. HF: heart failure. LBBB: left bundle branch block. mvPA: mean velocity

pulmonary artery.

**Supplemental Table S2.** Baseline clinical characteristics according to mvPA.

|                                                         | mvAP ≤ 9cm/s<br>(n=30) | mvAP > 9cm/s<br>(n=28) | Total sample<br>(n=58) | p-value |
|---------------------------------------------------------|------------------------|------------------------|------------------------|---------|
| Age (years)                                             | 67.7±11.9              | 67.3±15.3              | 67.5±13.5              | 0.821   |
| Sex, male (n,%)                                         | 15(50)                 | 19(67.9)               | 34(58.6)               | 0.168   |
| BSA (m <sup>2</sup> )                                   | 1.76±0.17              | 1.81±0.17              | 1.8±0.17               | 0.077   |
| Arterial hypertension (n,%)                             | 17(56.7)               | 13(46.4)               | 30(51.7)               | 0.436   |
| Diabetes mellitus (n,%)                                 | 7(23.3)                | 3(10.7)                | 10(17.2)               | 0.204   |
| Dislipidemia (n,%)                                      | 14(46.7)               | 10(35.7)               | 24(41.4)               | 0.397   |
| Atrial fibrillation (n,%)                               | 14(46.7)               | 13(46.4)               | 27(46.6)               | 0.986   |
| LBBB                                                    | 3(10)                  | 2(7.1)                 | 5(8.6)                 | 0.698   |
| Previous coronary artery disease (n,%)                  | 3(10)                  | 5(17.9)                | 8(13.8)                | 0.386   |
| Glomerular filtration rate (ml/min/1.73m <sup>2</sup> ) | 75.9±16.5              | 69.3±18.9              | 72.9±17.8              | 0.250   |
| Stage 3-4 chronic kidney disease (n,%)                  | 1(3.4)                 | 5(17.9)                | 6(10.3)                | 0.061   |
| NT-proBNP (pg/mL)                                       | 1469.6±1443.5          | 1094±878.6             | 1281.8±1164.5          | 0.456   |
| Prior HF hospitalization (n,%)                          | 6(20)                  | 6(21.4)                | 12(20.7)               | 0.893   |
| NYHA functional class (n,%)                             |                        |                        |                        | 0.224   |
| I                                                       | 8(26.7)                | 11(39.3)               | 19(32.8)               |         |
| II                                                      | 11(36.7)               | 13 (46.4)              | 24(41.4)               |         |
| III                                                     | 8(26.7)                | 2(7.1)                 | 10(17.2)               |         |
| IV                                                      | 3(10)                  | 2(7.1)                 | 5(8.6)                 |         |
| NYHA III-IV/IV (n, %)                                   | 4(13.3)                | 4(14.3)                | 8(13.8)                | 0.916   |
| Cerebrovascular disease (n,%)                           | 67.7±11.9              | 67.3±15.3              | 67.5±13.5              | 0.821   |

BSA: body surface area. HF: heart failure. LBBB: left bundle branch block. mvPA: mean velocity

pulmonary artery.
